# Supplementary material for: The atmospheric fate of 1,2-Dibromo-4-(1,2-dibromoethyl)cyclohexane (TBECH): Spatial patterns, seasonal variability, and deposition to Canadian coastal regions
Source: Copernicus journal article supplement (doi:10.5194/egusphere-2023-1151), 2023-06-05
Supplement: Supplementary file [file egusphere-2023-1151-AC1-supplement.pdf]

## Response to Terry Bidleman's community comment on: Oh, Jenny, The atmospheric fate of 1,2-Dibromo-4-(1,2-dibromoethyl)cyclohexane (TBECH...) (egosphere-2023-1151)

Line 54. Would be good to state the percentages of the four TBECH isomers in the technical mix. Relevant also for Section 4.1.2.

Thank you very much for the suggestion. The manuscript will be modified to include the percentages of the isomers in the introduction. Changes are in bold: "While commercial TBECH comprises mostly the  $\alpha$ - and  $\beta$ -isomers (**57.3% and 42.5%, respectively**) (Ruan et al., 2018), TBECH has been reported to thermally isomerize to the  $\gamma$  and  $\delta$  isomers when heated to 123 °C (Arsenault et al., 2008)."

Line 217. How do the ratios in air compare with those in the technical mix, and in other locations where TBECH in air has been reported?

The comparisons between the ratios reported in our study and elsewhere is summarized in Table S13. This is further explored in section 4.2, when discussing the (lack of) divergent atmospheric fate of the isomers. However, based on the suggestion, the manuscript will be modified to explicitly state the comparison to reported ratios of the technical mixtures of TBECH in section 4.2: "This slightly higher abundance of the  $\alpha$ -isomer relative to the  $\beta$ -isomer is consistent with earlier reports of TBECH elsewhere in the atmosphere (Table S13), **as well as with the reported abundances in technical mixtures (Arsenault et al., 2008; Ruan et al., 2018).**"

Looking for Saturna Island and Tadoussac on the maps, but can't find them. Possible to label the appropriate dots on the map?

The sites in Saturna Island and Tadoussac were mentioned in section 2.1.2 (L43 and S57, respectively). These sites can be located on Figure S1. This section will be updated to clarify: "These were on Saturna Island, BC (L43 **on Figure S1**; ca. 42 km NNE of Victoria; pop. ~300; Dec. 2019 - Nov. 2020; n=11) and Tadoussac, QC (near S57 **on Figure S1**; ca. 190 km NE of Quebec City; pop. ~800; Dec. 2020 and Nov. 2021; n=12)."

Line 326. Section 3.3. Interesting that TBECH was prominent in Saturna Island precipitation, whereas concentrations in the AAS were quite low. The dimensionless scavenging ratios,  $SR = C_{precip}/C_{air}$ , are on the order of  $10^6 - 10^7$  (Fig. S17). As the authors note in Section 4.1.2, such SRs are much higher than commonly encountered for gaseous chemicals and they are even on the high end of SRs for particle-bound chemicals. The authors discuss possible reasons for this in Section 4.1.2. Not mentioned is the possibility that a difference in air masses might account for this. On page S31 the authors state: "In the studied region, summer air comes from the Pacific Ocean and winter air from the continent." Could there also be a vertical influence at this coastal site? Warm continental air with higher TBECH at the cloud level (scavenged by precip.) overriding cooler clean ocean air underneath (sampled by AAS)?

Differences in air masses is another plausible explanation that may contribute to the high scavenging ratios observed at Saturna Island. We will update section 4.1.2 to include this reasoning: "Other potential reasons include: **i) differences in air masses at different altitudes, where the warm continental air containing higher TBECH levels at the cloud level is scavenged by precipitation and has overridden the cooler clean ocean air at lower altitudes that was sampled by AAS**, ii) adsorption that occurs at the water-air interface (Hoff et al., 1993), or iii) the BFRs experience sorption to dissolved organic matter and other sorption phases (Poster and Baker, 1996), all which could lead to higher scavenging ratios. However, information on interface adsorption coefficients of the BFRs and other sorption phases at Saturna Island and Tadoussac is limited."

Line 332, Section 3.4. The enantiomer elution order is not specified here. In Supplementary Text 4, this statement is made: "To determine enantiomer fraction (EFs) for  $\alpha$ -TBECH, the elution order was used and calculated as  $E1/(E1+E2)$ , since the correspondence between optical signs and chromatographic elution is unknown for the TBECH (Wong et al., 2012)." Could the authors also state that  $EF = E1/(E1+E2)$  in Section 3.4?

Thank you very much for the suggestion. We will update the manuscript to include the EF formula in section 3.4: "The results of the chiral analysis are presented using enantiomeric fractions (EFs), **where the chromatographic elution order of the enantiomers was used to calculate  $EF=E1/(E1+E2)$ .**"

Line 409, Section 4.2. The title of the paper says "...atmospheric fate"..., and "fate" is partly accounted for through discussions of deposition and air-water exchange. However, degradative fate is not discussed, and this section would be a good place for it. Can some

simple statements be made about predictive OH radical degradation (AOPWIN)? My guess is that the model will not differentiate among the TBECH isomers, but at least would provide information to balance against deposition removal.

We are grateful for being alerted to this omission and we will include a paragraph in section 4.2 that discusses what is known about the degradation reactions of TBECH in the atmosphere. The predicted rate constants will also be tabulated in Table 1:

**Information on the atmospheric degradation of TBECH has been extremely limited, with no experimental results in the literature to date. Using density functionals, Wang et al. (2021) predicted rate constants for the stereospecific hydroxyl radical-initiated transformation of  $7.1 \times 10^{-11}$  and  $1.2 \times 10^{-10}$  cm<sup>3</sup>/s at 293 K for  $\alpha$ - and  $\beta$ -TBECH, respectively, which, when applying  $9.7 \times 10^{-5}$  molecules/cm<sup>3</sup> as the concentration of OH radicals in the atmosphere, corresponds to atmospheric lifetimes of 4.0 and 2.4 hours. Such relatively short gas-phase lifetimes are difficult to reconcile with the relatively wide dispersal of TBECH recorded in the current study. Neither do our measurements support the idea that the atmospheric lifetime of the  $\beta$ -isomer is considerably short than that of  $\alpha$ -TBECH, as this should have been apparent in an increasing relative abundance of  $\alpha$ -TBECH with increasing distance from sources.**

**Rate constants predicted with COSMOtherm and the Atmospheric Oxidation Program for Microsoft Windows (AOPWIN) via EPI Suite (Table 1) are on the same order of magnitude and correspond to much longer atmospheric lifetimes (6.2 and 6.4 days for  $\alpha$ - and  $\beta$ -TBECH, respectively, using COSMOtherm; 2.5 days for both isomers using AOPWIN) than those predicted by Wang et al. (2021). These longer lifetimes and the similar rates of reaction of the two main isomers are more consistent with the observed atmospheric dispersion of TBECH.**

Line 437, Section 4.3. It seems that the “elephant in the room” has been ignored in this discussion – the possibility of air transport from the U.S.! Especially since the sampling sites are not far from the border. What is known about TBECH use south of the border?

TBECH is listed in EPA’s Toxic Substances Control Act (TSCA) Chemical Substance Inventory (last updated: February 2023). Its commercial activity status is currently marked as “inactive,” indicating that there is no manufacturer or processor in the US that produces or imports TBECH for non-exempt commercial purposes (<https://www.epa.gov/tsca-inventory/tsca-inventory-notification-active-inactive-rule>). Moreover, TBECH currently has no regulatory flags in the inventory, most likely resulting in low priority for environmental assessment. In other words, the situation with TBECH in the US is similar to that of in Canada, where according to official documentation, TBECH should not exist in the US. Therefore, atmospheric transport from point sources in the US is not likely.

If atmospheric transport from the US played a contributory role in the amount of TBECH detected in the Canadian atmosphere, then we would also expect a more uniform spatial variability in the air concentration of TBECH in Canada. The distinct relationship between air concentration and population observed in our study suggests that the main source of TBECH is domestic.

Section 4.3 will be changed to include the US in the discussion: "The inventory update phase 3 survey in 2017 under Canada’s Chemical Management Plan (CMP) resulted in no reports of manufacturing or importing TBECH into the country by domestic companies, eliminating the possibility of point sources located in Canada for this flame retardant, such as factories that produce or import commercial TBECH. **Similarly, the United States Environmental Protection Agency’s (US EPA) Toxic Substances Control Act (TSCA) Chemical Substance Inventory contains no records of the production or importation of TBECH for commercial purposes in the US, indicating that there are also no point sources of TBECH located in the US to contribute to the TBECH levels observed in Canada *via* atmospheric transport.**"
